# Supplementary material
Source: ML conference proceedings conference paper supplement (https://openreview.net/forum?id=pVlC0reMKq)
Supplement: supplementary_material [file attachment]

## Appendix

### A RETVec Model Details

Table 7 details the hyperparameter settings for the RETVec model architecture, as described in Section 3.

| Hyperparameter              | RETVec |
|-----------------------------|--------|
| Max word length             | 16     |
| Per-character encoding dim  | 24     |
| Activation                  | GeLU   |
| # of projection layers      | 1      |
| Projection layer dim        | 32     |
| # of fully-connected layers | 2      |
| Fully-connected layer dim   | 256    |
| Spatial dropout rate        | 0.0625 |
| Dropout rate                | 0      |
| Embedding activation        | Tanh   |
| Embedding dim               | 256    |
| Similarity dim              | 256    |

Table 7: RETVec model hyperparameter details.

### B Benchmarking Models

In this section, we provide more detailed model hyperparameters for the evaluation models used in Section 5 and Section 8.

**RNN** We used a Stacked-LSTM architecture, with the following hyperparameters:

- Dim: 256
- Layers: 4
- Dropout rate: 0.1

**DPCNN** We use the architecture described in [14], with the following hyperparameters:

- Filters: 256
- Layers: 6
- Kernel size: 3
- Final dropout: 0.5
- Activation: ReLU

**BERT-Mini** We use the architecture as described in [6] for BERT-Mini, with the following hyperparameters:

- Layers: 4
- Hidden dim: 256
- Intermediate dim: 1024
- Self-attention heads: 4
- Dropout rate: 0.1
- Activation: GeLU

**BERT-Base** We use the architecture described in [6] for BERT-Base, with the following hyperparameters:

- Layers: 12
- Hidden dim: 768
- Intermediate dim: 3072
- Self-attention heads: 12
- Dropout rate: 0.1
- Activation: GeLU

## C RETVec Ablation Studies

In this section, we present our ablation study results for the RETVec model design and hyperparameter selection. Results are reported on the Multilingual Amazon Reviews dataset following the methodology described in Section 10.

### C.1 Embedding Dimension

Detailed results on how RETVec’s embedding layer dimension affects classification performance are reported in Table 8.

| Embedding Dim | Pre-training Loss | Test Accuracy |       |       |       |
|---------------|-------------------|---------------|-------|-------|-------|
|               |                   | RNN           | CNN   | BERT  | AVG   |
| 64            | 0.0284            | 92.8%         | 91.8% | 92.5% | 92.4% |
| 100           | 0.0267            | 93.2%         | 92.1% | 92.4% | 92.6% |
| 128           | 0.0260            | 93.3%         | 92.2% | 92.5% | 92.7% |
| 200           | 0.0253            | 93.4%         | 92.3% | 92.6% | 92.7% |
| <b>256</b>    | 0.0248            | 93.6%         | 92.3% | 92.8% | 92.9% |
| 300           | 0.0245            | 93.6%         | 92.3% | 92.6% | 92.8% |
| 384           | 0.0237            | 93.6%         | 92.2% | 92.6% | 92.8% |
| 512           | 0.0225            | 93.7%         | 92.3% | 92.8% | 92.9% |

Table 8: Ablation study results on the effect of the RETVec pre-trained model’s embedding dimension on classification performance. **Bold** denotes the hyperparameter selected for the final RETVec model.

### C.2 Model Architecture

Detailed results on the effect of RETVec architecture type on classification performance are reported in Table 9.

| Architecture | Pre-training Loss | Test Accuracy |       |       |       |
|--------------|-------------------|---------------|-------|-------|-------|
|              |                   | RNN           | CNN   | BERT  | AVG   |
| <b>MLP</b>   | 0.0248            | 93.6%         | 92.3% | 92.8% | 92.9% |
| MLP + BERT   | 0.0129            | 93.2%         | 92.0% | 92.4% | 92.5% |
| MLP + T5     | 0.0120            | 93.5%         | 92.2% | 92.5% | 92.7% |
| MLP + GAU    | 0.0133            | 93.5%         | 92.2% | 92.8% | 92.8% |
| MLP + LSTM   | 0.0179            | 93.4%         | 91.9% | 92.5% | 92.6% |
| MLP + CNN    | 0.0214            | 93.5%         | 92.1% | 92.6% | 92.7% |

Table 9: Ablation study results on RETVec model architecture type on classification performance. **Bold** denotes the hyperparameter selected for the final RETVec model.

### C.3 Maximum Word length

Detailed results on how RETVec’s maximum input word length affects classification performance are reported in Table 10.

| Word Len  | Pre-training Loss | Test Accuracy |       |       |       |
|-----------|-------------------|---------------|-------|-------|-------|
|           |                   | RNN           | CNN   | BERT  | AVG   |
| <b>8</b>  | 0.0428            | 93.6%         | 92.3% | 92.7% | 92.8% |
| 10        | 0.0326            | 93.5%         | 92.4% | 92.6% | 92.8% |
| 12        | 0.0267            | 93.5%         | 92.2% | 92.7% | 92.8% |
| 14        | 0.0259            | 93.5%         | 92.2% | 92.6% | 92.8% |
| <b>16</b> | 0.0248            | 93.6%         | 92.3% | 92.8% | 92.9% |
| 20        | 0.0242            | 93.5%         | 92.2% | 92.6% | 92.7% |
| 24        | 0.0234            | 93.6%         | 92.3% | 92.7% | 92.9% |
| 28        | 0.0246            | 93.5%         | 92.2% | 92.7% | 92.8% |
| 32        | 0.0235            | 93.6%         | 92.2% | 92.6% | 92.8% |

Table 10: Ablation study results on the effect of maximum word length on RETVec classification performance. **Bold** denotes the hyperparameter selected for the final RETVec model.

#### 427 C.4 Pre-training Loss Hyperparameters

428 Detailed results on the effect of Multi-Similarity loss hyperparameters on RETVec classification  
429 performance are reported in Table [11](#). We also experimented with Circle Loss [26](#) and report the  
430 results in Table [12](#).

| Hyperparameter |           |            | Pre-training Loss | Test Accuracy |       |       |       |
|----------------|-----------|------------|-------------------|---------------|-------|-------|-------|
| $\alpha$       | $\beta$   | $\lambda$  |                   | RNN           | CNN   | BERT  | AVG   |
| 2              | 20        | 0.5        | 0.0432            | 93.5%         | 92.1% | 92.4% | 92.7% |
| 2              | 20        | 1.0        | 0.2643            | 92.9%         | 91.2% | 92.6% | 92.2% |
| 2              | 40        | 0.5        | 0.0455            | 93.6%         | 92.1% | 92.6% | 92.7% |
| 2              | 40        | 1.0        | 0.3610            | 92.9%         | 91.2% | 92.4% | 92.2% |
| 2              | 80        | 0.5        | 0.0464            | 93.5%         | 92.3% | 92.6% | 92.8% |
| 2              | 80        | 1.0        | 0.3583            | 92.6%         | 91.1% | 92.4% | 92.0% |
| 4              | 20        | 0.5        | 0.0270            | 93.4%         | 92.0% | 92.6% | 92.7% |
| 4              | 20        | 1.0        | 0.1537            | 93.0%         | 91.3% | 92.4% | 92.2% |
| 4              | 40        | 0.5        | 0.0242            | 93.5%         | 92.4% | 92.6% | 92.8% |
| 4              | 40        | 1.0        | 0.1919            | 92.8%         | 91.3% | 92.4% | 92.2% |
| <b>4</b>       | <b>80</b> | <b>0.5</b> | 0.0248            | 93.6%         | 92.3% | 92.8% | 92.9% |
| 4              | 80        | 1.0        | 0.1851            | 92.8%         | 91.2% | 92.4% | 92.1% |

Table 11: Ablation study results on the effect of Multi-Similarity loss hyperparameters on RETVec classification performance.  $\epsilon = 0.1$  is fixed for all experiments. **Bold** denote the hyperparameters selected for the final RETVec model.

| Circle-Loss Hyperparameter |                       |  | Pre-training Loss | Test Accuracy |       |       |       |
|----------------------------|-----------------------|--|-------------------|---------------|-------|-------|-------|
| Scale Factor $\gamma$      | Relaxation Factor $m$ |  |                   | RNN           | CNN   | BERT  | AVG   |
| 64                         | 0.3                   |  | 7.55              | 93.3%         | 91.9% | 92.6% | 92.6% |
| 64                         | 0.4                   |  | 2.77              | 93.5%         | 92.0% | 92.4% | 92.7% |
| 64                         | 0.5                   |  | 0.63              | 93.6%         | 92.4% | 92.6% | 92.9% |
| 128                        | 0.3                   |  | 12.85             | 93.3%         | 91.9% | 92.6% | 92.6% |
| 128                        | 0.4                   |  | 5.06              | 93.6%         | 92.1% | 92.6% | 92.8% |
| 128                        | 0.5                   |  | 1.18              | 93.6%         | 92.3% | 92.6% | 92.9% |
| 256                        | 0.3                   |  | 24.97             | 93.3%         | 91.9% | 92.5% | 92.5% |
| 256                        | 0.4                   |  | 9.49              | 93.5%         | 92.0% | 92.4% | 92.7% |
| 256                        | 0.5                   |  | 2.59              | 93.7%         | 92.4% | 92.5% | 92.9% |
| 512                        | 0.3                   |  | 49.01             | 93.2%         | 92.0% | 92.6% | 92.6% |
| 512                        | 0.4                   |  | 19.88             | 93.3%         | 92.2% | 92.7% | 92.7% |
| 512                        | 0.5                   |  | 5.26              | 93.6%         | 92.4% | 92.7% | 92.9% |

Table 12: Ablation study results for pre-training RETVec with various Circle Loss [26](#) hyperparameter settings.

#### 431 C.5 Model Capacity

432 Detailed results on how the number and dimension of fully-connected dense layers in the RETVec  
433 model affects classification performance are presented in Table [13](#).

| # Layers | Dim        | Pre-training Loss | Test Accuracy |       |       |       |
|----------|------------|-------------------|---------------|-------|-------|-------|
|          |            |                   | RNN           | CNN   | BERT  | AVG   |
| 0        | -          | 0.0445            | 92.8%         | 91.6% | 92.3% | 92.2% |
| 1        | 128        | 0.0383            | 93.5%         | 91.8% | 92.4% | 92.6% |
| 1        | 256        | 0.0312            | 93.5%         | 91.8% | 92.4% | 92.6% |
| 1        | 384        | 0.0284            | 93.6%         | 92.0% | 92.6% | 92.7% |
| 1        | 512        | 0.0258            | 93.6%         | 92.2% | 92.8% | 92.8% |
| 2        | 128        | 0.0334            | 93.4%         | 91.9% | 92.6% | 92.6% |
| <b>2</b> | <b>256</b> | 0.0248            | 93.6%         | 92.3% | 92.8% | 92.9% |
| 2        | 384        | 0.0201            | 93.5%         | 92.3% | 92.6% | 92.8% |
| 2        | 512        | 0.0177            | 93.7%         | 92.3% | 92.6% | 92.9% |
| 3        | 128        | 0.0314            | 93.4%         | 91.9% | 92.5% | 92.6% |
| 3        | 256        | 0.0213            | 93.6%         | 92.4% | 92.5% | 92.8% |
| 3        | 384        | 0.0175            | 93.6%         | 92.2% | 92.7% | 92.8% |
| 3        | 512        | 0.0149            | 93.5%         | 92.4% | 92.6% | 92.8% |

Table 13: Ablation study results on the effect of RETVec model capacity (number and dimension of the fully-connected layers) on classification performance. **Bold** denote the hyperparameters selected for the final RETVec model.

## C.6 Spatial Dropout Rate

Detailed ablation study results on the amount of spatial dropout in the RETVec model and its effect on classification performance are presented in Table 14. Increments of 1/16 were used because it corresponds to dropping out one character of the input on average, since RETVec’s model accepts an input of up to 16 characters per word.

| Spatial Dropout | Pre-training Loss | Test Accuracy |       |       |       |
|-----------------|-------------------|---------------|-------|-------|-------|
|                 |                   | RNN           | CNN   | BERT  | AVG   |
| 0.00%           | 0.0122            | 93.4%         | 91.4% | 92.5% | 92.4% |
| <b>6.25%</b>    | 0.0248            | 93.6%         | 92.3% | 92.8% | 92.9% |
| 12.50%          | 0.0465            | 93.4%         | 92.0% | 92.3% | 92.6% |
| 18.75%          | 0.0722            | 92.7%         | 91.5% | 91.8% | 92.0% |
| 25.00%          | 0.0967            | 92.7%         | 91.4% | 91.2% | 91.8% |

Table 14: Ablation study results on the effect of spatial dropout rate on the RETVec input character encoding. **Bold** denotes the value selected for the final RETVec model.

## C.7 Pre-Training Objectives

We evaluated combining RETVec’s pre-training objective (Multi-Similarity loss) with other objective functions and pre-training tasks as well. Specifically, we experimented with the following objectives: 1) augmentation position prediction, 2) augmentation position and type prediction, 3) decoding (predicting the character encoding of the input token), and 4) denoising (predicting the character encoding of the original, non-augmented token). Table 15 reports the results of our experiments on different pre-training objectives.

| Objectives                                            | Similarity Loss | Total Loss | RNN   | CNN   | BERT  | AVG   |
|-------------------------------------------------------|-----------------|------------|-------|-------|-------|-------|
| Similarity, Augmentation Position Detection           | 0.0261          | 0.2228     | 93.4% | 92.0% | 92.8% | 92.7% |
| Similarity, Augmentation Position and Type Prediction | 0.0238          | 0.0970     | 93.2% | 92.2% | 92.6% | 92.7% |
| Similarity, Decoding                                  | 0.0278          | 0.0384     | 93.5% | 92.1% | 92.6% | 92.8% |
| Similarity, Denoising                                 | 0.0241          | 0.1088     | 93.3% | 91.8% | 92.7% | 92.6% |
| Similarity                                            | 0.0248          | 0.0248     | 93.6% | 92.3% | 92.8% | 92.9% |

Table 15: Ablation study results on combining different pre-training objectives with similarity loss for RETVec pre-training.

## D RETVec Pre-training Dataset Augmentations

Below, we provide the full list of character-level augmentations (broken down into four categories) used to generate typo-augmented words for the RETVec pre-training dataset, as described in Section 3.3

- Deletion
- Insertion
  - Repeated character insertion
  - n-grams based prefix insertion for  $n = 3, 4, 5$
  - n-grams based suffix insertion for  $n = 3, 4, 5$
  - Random ASCII character insertion
  - Language alphabet-based random character insertion
  - Random punctuation insertion
  - Random punctuation prefix
  - Random punctuation suffix
  - Random BMP Unicode insertion
  - Random emoji prefix
  - Random emoji suffix
- Substitution
  - Case substitution
  - n-grams based substitution for  $n = 3, 4, 5$
  - QWERTY keyboard typo substitution
  - Homoglyphs substitution
  - Random ASCII character substitution
  - Language alphabet-based random character substitution
  - Random punctuation substitution
  - Random BMP Unicode substitution
- Transposition
  - Neighboring character swap
  - 3-character block random shuffle

## E RETVec Pre-training Hyperparameters

We train RETVec using Multi-Similarity loss with hyperparameters  $\alpha = 4$ ,  $\beta = 40$ ,  $\epsilon = 0.1$  and  $\lambda = 0.5$ . Detailed pre-training hyperparameters are reported in Table 16.

| Hyperparameter     | Pre-training |
|--------------------|--------------|
| Training steps     | 500k         |
| Batch size         | 1024         |
| Adam $\epsilon$    | 1.00e-7      |
| Adam $\beta_1$     | 0.9          |
| Adam $\beta_2$     | 0.999        |
| Weight decay       | 0            |
| Peak learning rate | 0.001        |
| End learning rate  | 0.0001       |
| Warmup steps       | 10000        |
| Decay function     | Cosine       |

Table 16: RETVec pre-training optimizer hyperparameters.

| Dataset                | Vectorizer    | 0%    | 10%   | 20%   | 30%   | 40%   | 50%   | 60%   | 70%   | 80%   | 90%   | 100%  |
|------------------------|---------------|-------|-------|-------|-------|-------|-------|-------|-------|-------|-------|-------|
| AG News                | Whitespace    | 92.0% | 91.6% | 91.0% | 90.2% | 88.6% | 86.8% | 83.8% | 79.3% | 72.3% | 63.5% | 49.1% |
|                        | SentencePiece | 91.8% | 91.0% | 89.9% | 88.5% | 86.2% | 82.8% | 78.7% | 74.0% | 67.9% | 60.9% | 51.5% |
|                        | BPE           | 91.6% | 90.5% | 89.1% | 87.6% | 84.8% | 80.6% | 76.1% | 70.2% | 63.8% | 56.2% | 46.3% |
|                        | fastText      | 92.8% | 92.1% | 91.6% | 90.7% | 89.1% | 87.8% | 85.1% | 82.5% | 77.2% | 70.5% | 59.7% |
|                        | RETVec-raw    | 91.0% | 90.3% | 89.6% | 88.3% | 87.3% | 85.5% | 83.7% | 81.8% | 78.2% | 74.7% | 68.5% |
|                        | RETVec        | 92.6% | 92.1% | 91.6% | 91.1% | 90.5% | 89.9% | 88.7% | 87.3% | 86.0% | 84.2% | 81.2% |
| Yelp P.                | Whitespace    | 93.2% | 92.5% | 91.6% | 90.5% | 88.6% | 86.7% | 84.1% | 80.4% | 75.8% | 69.7% | 60.9% |
|                        | SentencePiece | 93.1% | 91.5% | 89.7% | 87.7% | 85.1% | 81.9% | 78.7% | 75.1% | 71.2% | 67.4% | 62.6% |
|                        | BPE           | 93.0% | 91.7% | 90.2% | 88.5% | 86.2% | 83.5% | 80.5% | 77.2% | 73.1% | 69.0% | 64.2% |
|                        | fastText      | 94.1% | 93.5% | 92.8% | 92.0% | 90.7% | 89.3% | 87.9% | 85.8% | 83.1% | 80.2% | 75.6% |
|                        | RETVec-raw    | 92.4% | 91.7% | 90.9% | 89.8% | 88.6% | 87.2% | 85.7% | 83.7% | 81.2% | 78.6% | 74.5% |
|                        | RETVec        | 92.7% | 92.2% | 91.6% | 90.9% | 90.0% | 89.2% | 88.0% | 86.8% | 85.1% | 83.5% | 80.9% |
| Multilingual Amazon P. | Whitespace    | 92.7% | 92.1% | 91.6% | 91.1% | 90.2% | 89.1% | 87.9% | 86.2% | 83.7% | 80.9% | 75.0% |
|                        | SentencePiece | 89.6% | 88.5% | 87.5% | 86.2% | 84.5% | 82.6% | 80.7% | 78.7% | 76.1% | 73.9% | 70.7% |
|                        | BPE           | 88.9% | 87.7% | 86.6% | 85.4% | 83.6% | 81.8% | 80.1% | 77.9% | 75.3% | 73.4% | 70.3% |
|                        | fastText      | 86.2% | 85.5% | 84.8% | 84.0% | 82.9% | 81.0% | 80.1% | 77.9% | 75.9% | 73.9% | 70.2% |
|                        | RETVec-raw    | 92.3% | 91.6% | 90.8% | 90.0% | 89.0% | 87.7% | 86.3% | 84.8% | 82.7% | 80.6% | 77.0% |
|                        | RETVec        | 92.9% | 92.5% | 92.0% | 91.7% | 91.3% | 90.6% | 90.2% | 89.5% | 88.6% | 87.7% | 86.1% |
| MASSIVE                | Whitespace    | 70.0% | 58.9% | 58.8% | 58.4% | 55.8% | 51.7% | 49.2% | 43.9% | 37.1% | 34.8% | 17.3% |
|                        | SentencePiece | 69.0% | 58.5% | 58.4% | 57.8% | 55.8% | 52.7% | 50.7% | 46.7% | 41.8% | 40.9% | 29.6% |
|                        | BPE           | 65.5% | 54.6% | 54.4% | 54.1% | 52.0% | 48.6% | 46.9% | 42.7% | 38.4% | 37.0% | 26.4% |
|                        | fastText      | 16.7% | 15.5% | 16.1% | 15.2% | 14.8% | 14.3% | 13.9% | 13.7% | 13.1% | 13.0% | 12.5% |
|                        | RETVec-raw    | 69.6% | 59.7% | 59.7% | 59.2% | 57.4% | 54.4% | 52.7% | 49.0% | 44.8% | 43.6% | 32.5% |
|                        | RETVec        | 73.2% | 65.7% | 65.7% | 65.5% | 63.9% | 61.8% | 60.4% | 57.5% | 54.1% | 52.9% | 43.5% |

Table 17: Random mixed typo resilience results (0% to 100% word typo rate) for each classification dataset and vectorizer. Following the methodology described in Section 6, test accuracy on each dataset is reported and results are averaged across the three model architectures we benchmarked in 5

## F Typo Resilience Evaluation

Detailed results for random mixed typo resilience across every dataset and vectorizer can be found in Table 17

## G Adversarial Resilience Evaluation

We report adversarial attack resilience results for all vectorizers, classification models, and adversarial attack algorithms we benchmarked in Table 18. The TextAttack 20 framework was used to conduct all three types of adversarial attacks.

| Model | Vectorizer    | TextBugger   |               |               | Pruthi       |               |               | DeepWordBug  |               |               |
|-------|---------------|--------------|---------------|---------------|--------------|---------------|---------------|--------------|---------------|---------------|
|       |               | Original Acc | Acc under Atk | Atk Success % | Original Acc | Acc under Atk | Atk Success % | Original Acc | Acc under Atk | Atk Success % |
| LSTM  | Whitespace    | 90.6%        | 9.9%          | 89.1%         | 90.6%        | 84.2%         | 7.1%          | 90.6%        | 9.9%          | 89.1%         |
|       | SentencePiece | 90.3%        | 0.8%          | 99.1%         | 90.3%        | 68.1%         | 24.6%         | 90.3%        | 0.8%          | 99.1%         |
|       | BPE           | 88.1%        | 3.3%          | 96.3%         | 88.1%        | 73.3%         | 16.8%         | 88.1%        | 3.3%          | 96.3%         |
|       | fastText      | 92.7%        | 14.4%         | 84.5%         | 92.7%        | 83.3%         | 10.1%         | 92.7%        | 14.4%         | 84.5%         |
|       | RETVec-raw    | 90.8%        | 22.3%         | 75.4%         | 90.8%        | 74.8%         | 17.6%         | 90.8%        | 22.3%         | 75.4%         |
|       | RETVec        | 91.8%        | 23.7%         | 74.2%         | 91.8%        | 80.9%         | 11.9%         | 91.8%        | 23.7%         | 74.2%         |
| CNN   | Whitespace    | 90.9%        | 17.6%         | 80.6%         | 90.9%        | 83.8%         | 7.8%          | 90.9%        | 9.0%          | 90.1%         |
|       | SentencePiece | 90.3%        | 2.9%          | 96.8%         | 90.3%        | 72.2%         | 20.0%         | 90.3%        | 3.5%          | 96.1%         |
|       | BPE           | 89.3%        | 31.8%         | 64.4%         | 89.3%        | 54.1%         | 39.4%         | 89.3%        | 43.5%         | 51.3%         |
|       | fastText      | 91.9%        | 17.3%         | 81.2%         | 91.9%        | 74.9%         | 18.5%         | 91.9%        | 15.4%         | 83.2%         |
|       | RETVec-raw    | 86.9%        | 30.1%         | 65.4%         | 86.9%        | 59.6%         | 31.4%         | 86.9%        | 37.7%         | 56.6%         |
|       | RETVec        | 91.4%        | 34.3%         | 62.5%         | 91.4%        | 77.4%         | 15.3%         | 91.4%        | 45.0%         | 50.8%         |
| BERT  | Whitespace    | 89.4%        | 9.8%          | 89.0%         | 89.4%        | 83.6%         | 6.5%          | 89.4%        | 3.3%          | 96.3%         |
|       | SentencePiece | 89.8%        | 2.8%          | 96.9%         | 89.8%        | 70.8%         | 21.2%         | 89.8%        | 3.7%          | 95.9%         |
|       | BPE           | 90.8%        | 8.2%          | 91.0%         | 90.8%        | 78.2%         | 13.9%         | 90.8%        | 1.2%          | 98.7%         |
|       | fastText      | 92.6%        | 22.9%         | 75.3%         | 92.6%        | 80.5%         | 13.1%         | 92.6%        | 18.1%         | 80.5%         |
|       | RETVec-raw    | 93.0%        | 30.8%         | 66.9%         | 93.0%        | 82.2%         | 11.6%         | 93.0%        | 38.9%         | 58.2%         |
|       | RETVec        | 93.7%        | 30.1%         | 67.9%         | 93.7%        | 84.6%         | 9.7%          | 93.7%        | 40.5%         | 56.8%         |

Table 18: Detailed adversarial resilience results on AG News. Results are reported on the same randomly selected 1000 examples from the AG News test split, following the methodology described in Section 7

## H Pre-training and Fine-tuning BERT

Table 19 details the hyperparameter settings used for pre-training and fine-tuning BERT-Base models. Table 20 shows detailed results on the GLUE benchmark, including the models’ average performance and standard deviation for each GLUE task.

| Hyperparameter    | Pre-training | Fine-tuning       |
|-------------------|--------------|-------------------|
| Training steps    | 100k steps   | 20 epochs         |
| Batch size        | 64           | 32                |
| Sequence length   | 512          | 512               |
| Adam $\epsilon$   | 1e-8         | 1e-8              |
| Adam $\beta_1$    | 0.9          | 0.9               |
| Adam $\beta_2$    | 0.999        | 0.999             |
| Weight decay      | 0.01         | 0.01              |
| Max learning rate | 5e-5         | 2e-5              |
| End learning rate | 0            | 0                 |
| Warmup steps      | 10000        | First 5% of steps |
| Decay function    | Linear       | None              |

Table 19: Pre-training and fine-tuning hyperparameters for BERT-Base models described in Section 8.

| Vectorizer    | MNLI              | QNLI              | QQP               | RTE               | SST-2             | MRPC              | CoLA              | STS-B             | GLUE Avg          |
|---------------|-------------------|-------------------|-------------------|-------------------|-------------------|-------------------|-------------------|-------------------|-------------------|
| SentencePiece | 80.6 (0.1)        | 88.4 (0.3)        | 90.1 (0.0)        | <b>66.1 (1.0)</b> | 90.8 (0.3)        | 85.4 (0.15)       | <b>50.3 (0.4)</b> | <b>82.0 (0.5)</b> | <b>79.2 (0.3)</b> |
| RETVec-raw    | <b>82.0 (0.5)</b> | <b>89.5 (0.1)</b> | <b>90.4 (0.1)</b> | 64.5 (0.9)        | <b>91.5 (0.1)</b> | 86.3 (0.9)        | 47.9 (1.1)        | 79.1 (0.2)        | 78.9 (0.4)        |
| RETVec        | 80.9 (0.4)        | 88.9 (0.3)        | 90.4 (0.1)        | 65.0 (0.7)        | 90.7 (0.2)        | <b>86.9 (0.4)</b> | 47.2 (0.7)        | 79.6 (0.2)        | 78.7 (0.3)        |

Table 20: Detailed results on GLUE Benchmark for pre-trained BERT-Base models using RETVec compared to SentencePiece. Each model is trained three times with different seeds, and the average and standard deviation is reported here. **Bold** indicates best results, underline indicates second best.

## 489 I fastText Word Dataset

490 Table 21 contains statistics on word length computed on the fastText word dataset using words from  
491 all 157 available languages.

| Avg | Median | Std | p90  | p95         | p99  | p99.9       |
|-----|--------|-----|------|-------------|------|-------------|
| 8.4 | 7.9    | 4.6 | 13.0 | <b>15.0</b> | 20.8 | <b>36.1</b> |

Table 21: Word length statistics computed on all fastText words from 157 languages. p90 denotes the 90th percentile, p95 denotes the 95th percentile, and so on.
